# Supplementary material for: Bimetallic single atom promoted α-MnO2 for enhanced catalytic oxidation of 5-hydroxymethylfurfural
Source: Royal Society of Chemistry journal article supplement (doi:10.1039/d2gc01769e), 2022-01-01
Supplement: d2gc01769e1.pdf [file d2gc01769e1.pdf]

## Supporting Information

### **Bimetallic Single Atom Promoted $\alpha$ -MnO<sub>2</sub> for Enhanced Catalytic Oxidation of 5-Hydroxymethylfurfural**

*Xuemei Liao*<sup>a</sup>, *Mengdie Guo*<sup>a</sup>, *Wei Tang*<sup>a</sup>, *Changwen Liu*<sup>a</sup>, *Wei Luo*<sup>b</sup>, *Lei Tan*<sup>b</sup>, *Tomohiro Noguchi*<sup>c</sup>, *Miho Yamauchi*<sup>c,d,e</sup>, *Yonghui Zhao*<sup>f</sup>, *Xiaopeng Li*<sup>b,\*</sup>

<sup>a</sup> College of Food and Biological Engineering, Xihua University, Chengdu 610039, Sichuan, China

<sup>b</sup> State Key Laboratory for Modification of Chemical Fibers and Polymer Materials & College of Materials Science and Engineering, Donghua University, No. 2999 North Renmin Road, Songjiang District, Shanghai 201620, China

<sup>c</sup> Institute for Materials Chemistry and Engineering, Motooka 744, Nishi-ku, Fukuoka 819-0395, Japan (IMCE), Kyushu University, Motooka 744, Nishi-ku, Fukuoka 819-0395, Japan

<sup>d</sup> Advanced Institute for Materials Research (AIMR), Tohoku University, 2-1-1 Katahira, Aoba-ku, Sendai, 980-8577, Japan

<sup>e</sup> Research Center for Negative Emissions Technologies (K-Nets), Kyushu University, Motooka 744, Nishi-ku, Fukuoka 819-0395, Japan

<sup>f</sup> CAS Key Laboratory of Low-Carbon Conversion Science and Engineering, Shanghai Advanced Research Institute (SARI), Chinese Academy of Sciences (CAS), No. 100, Haik Road, Pudong New District, Shanghai 201210, China

\*Corresponding Author E-mail: [xiaopeng.li@dhu.edu.cn](mailto:xiaopeng.li@dhu.edu.cn)

### **Experimental details:**

#### Preparation of Ni<sub>H</sub>/MnO<sub>2</sub>:

Ni<sub>H</sub>/MnO<sub>2</sub> catalyst was prepared by the impregnation method. The un-doped α-MnO<sub>2</sub> powder prepared by the hydrothermal method as described in the experimental part was added into the aqueous Ni(NO<sub>3</sub>)<sub>2</sub> solution (30 mL of ultrapure water, 0.104g Ni(NO<sub>3</sub>)<sub>2</sub> · 6H<sub>2</sub>O) under stirring for 1.5 h. Then the above suspension was evaporated in a water bath at 80 °C. The obtained brown-dark solid was dried in the oven overnight and finally calcined in a muffle furnace at 300 °C for 3 h.

#### Preparation of Pd<sub>H</sub>/MnO<sub>2</sub> and PdNi<sub>H</sub>/MnO<sub>2</sub>

Pd<sub>H</sub>/MnO<sub>2</sub> and PdNi<sub>H</sub>/MnO<sub>2</sub> catalysts were synthesized by a one-step hydrothermal method. The procedures were the same as that of PdNi/MnO<sub>2</sub> sample. The addition amount of Pd(NO<sub>3</sub>)<sub>2</sub> was 0.021g for Pd<sub>H</sub>/MnO<sub>2</sub>. For PdNi<sub>H</sub>/MnO<sub>2</sub>, The addition amounts of Pd(NO<sub>3</sub>)<sub>2</sub> and Ni(NO<sub>3</sub>)<sub>2</sub> were 0.007g and 0.104 g, respectively.

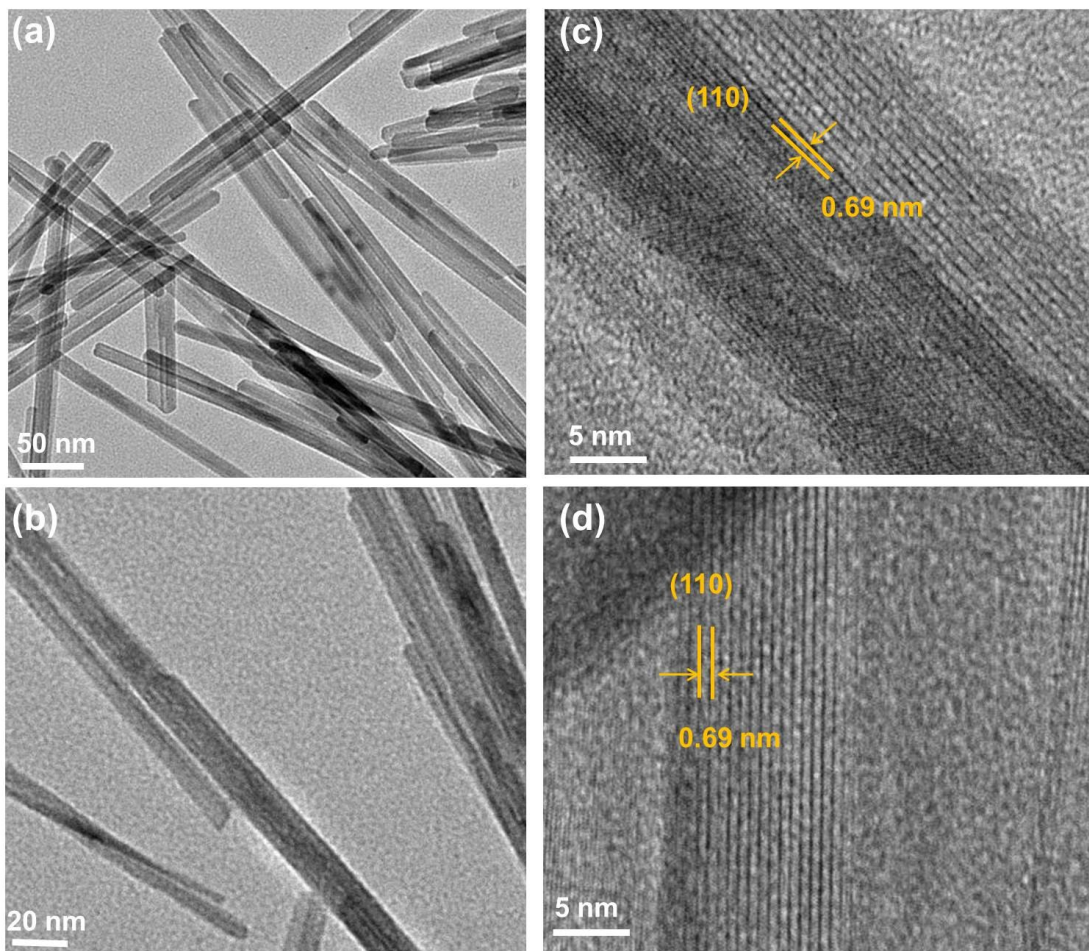

**Figure S1.** (a and b) TEM and (c and d) HRTEM images of non-doped MnO<sub>2</sub>.

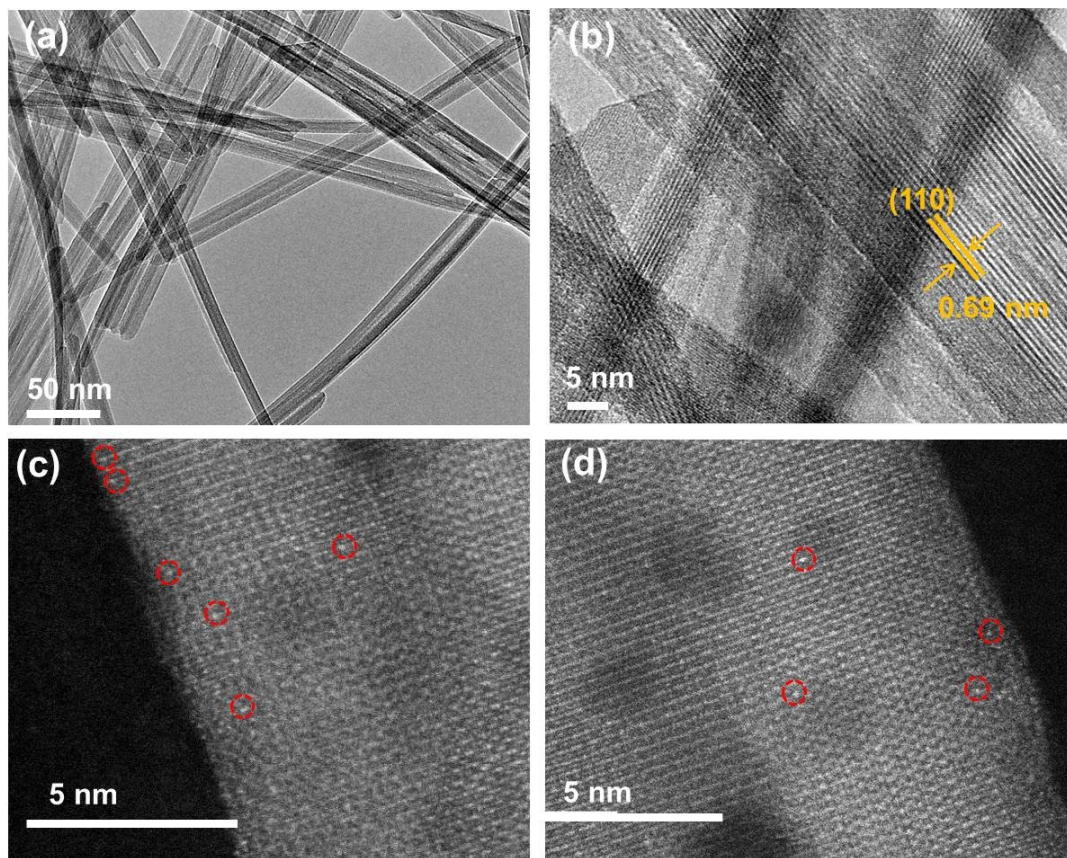

**Figure S2.** (a) TEM, (b) HRTEM, and (c-d) Sub-Ångström-resolution HAADF-STEM images of Pd/MnO<sub>2</sub>. Red dotted circle highlights the presence of single Pd atom.



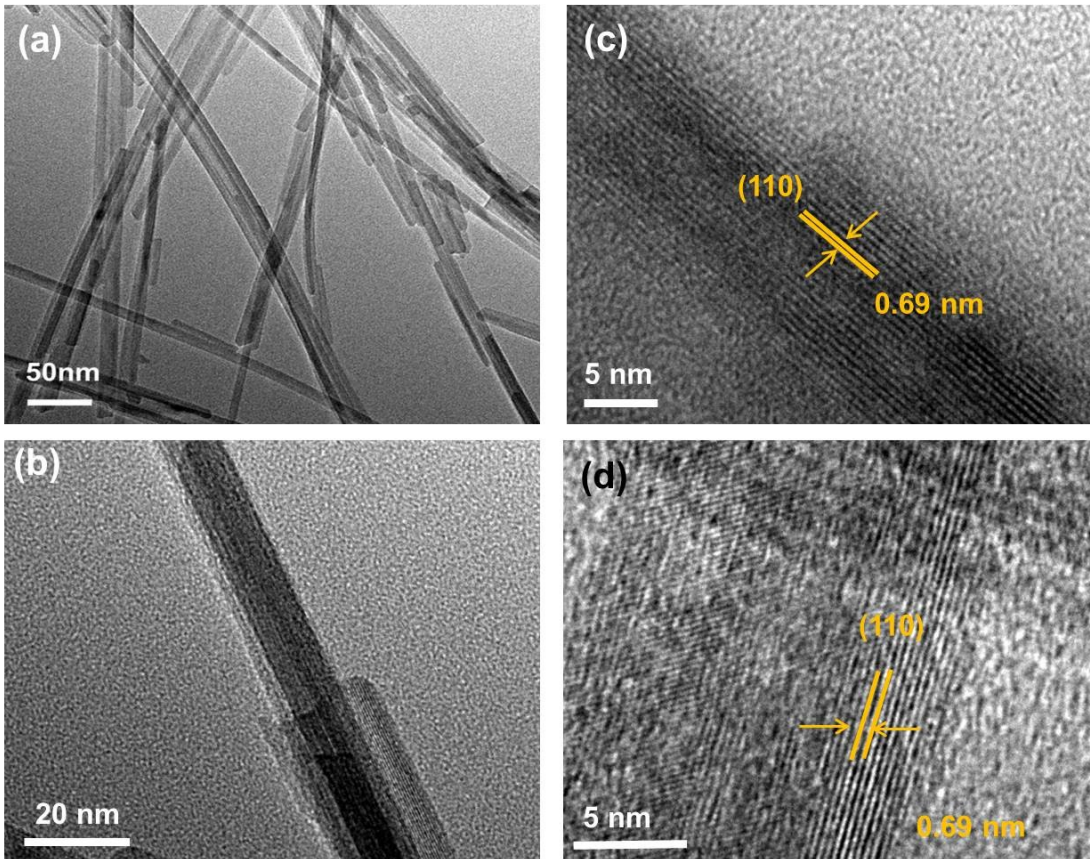

**Figure S3.** (a and b) TEM and (c and d) HRTEM images of Ni/MnO<sub>2</sub>.

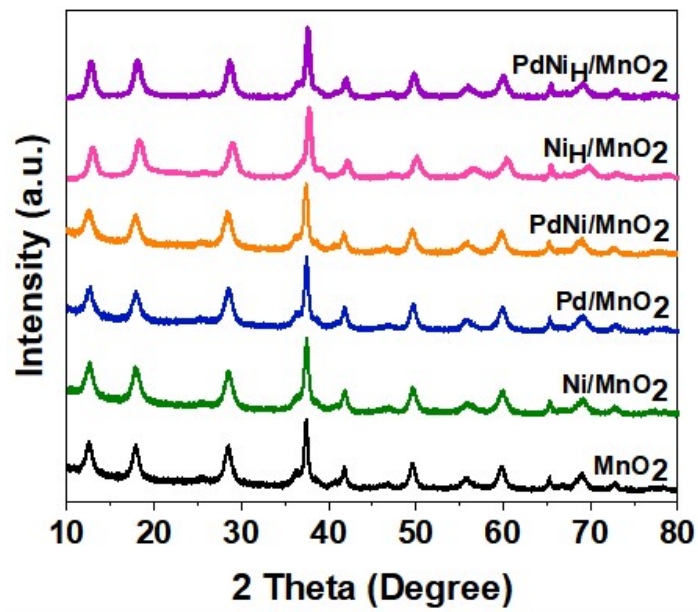

**Figure S4.** XRD pattern of the prepared catalysts.

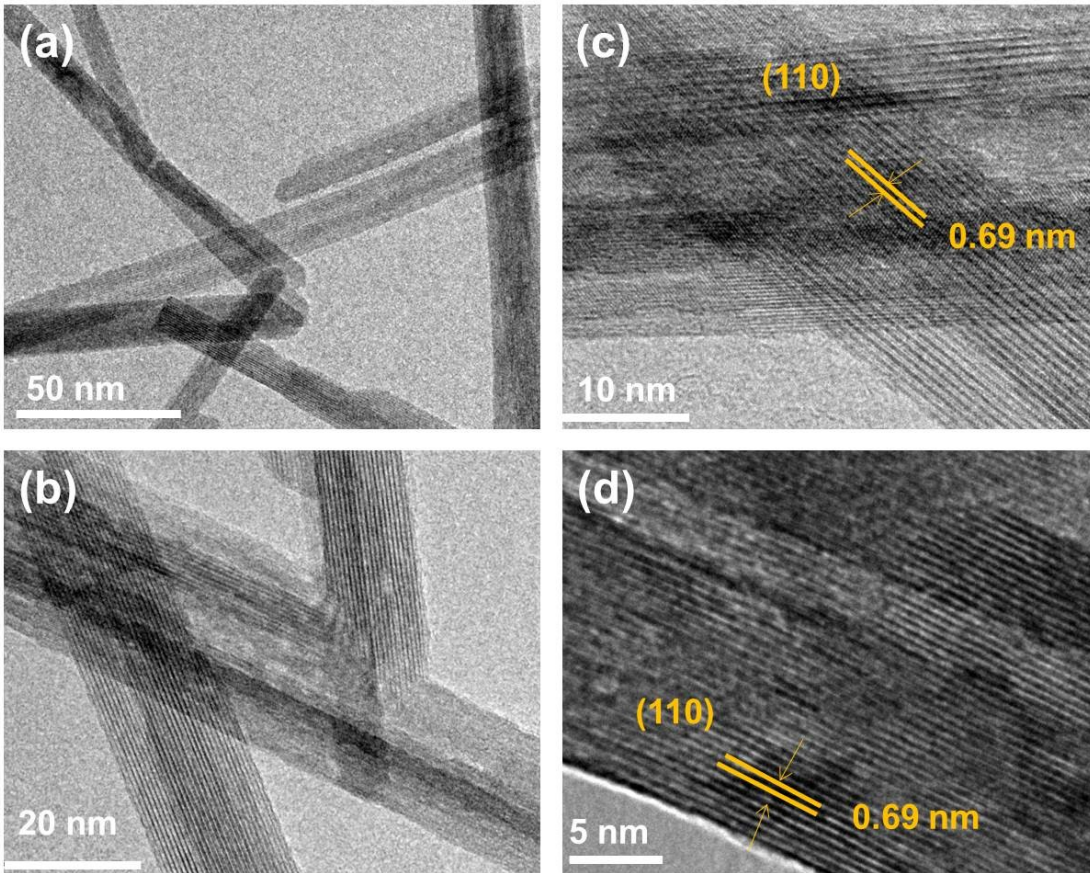

**Figure S5.** (a-b) TEM and (c-d) HRTEM images of PdNi/MnO<sub>2</sub>.



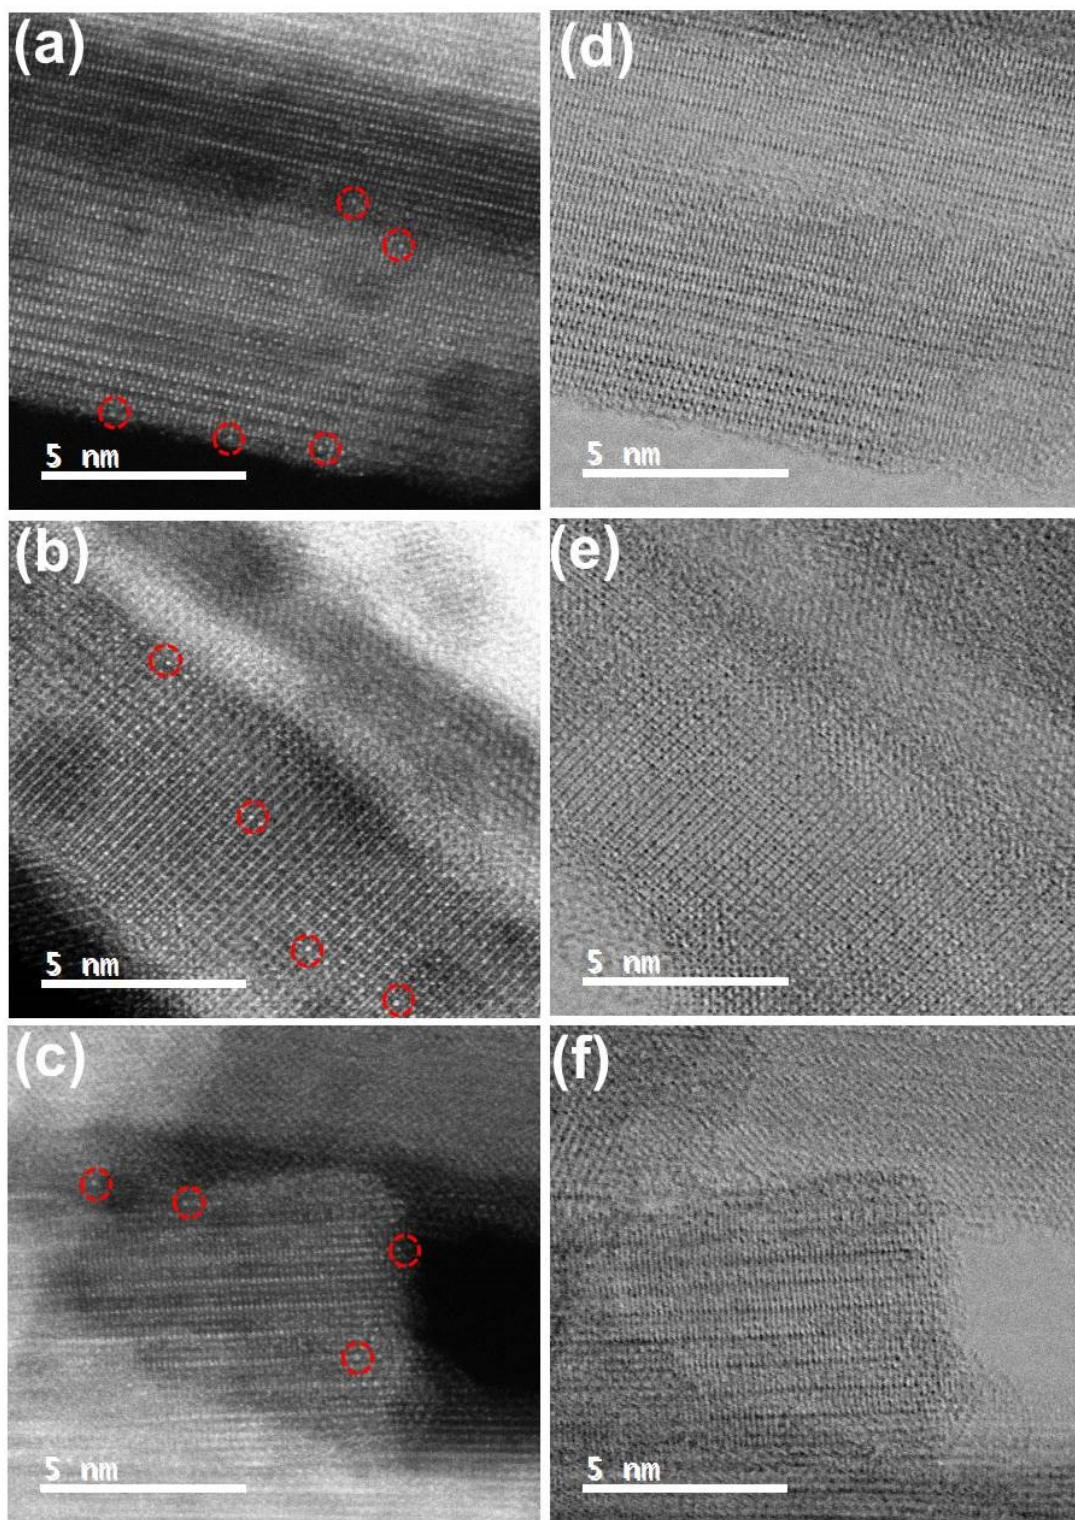

**Figure S6.** (a-c) HAADF-STEM images and the corresponding ABF-STEM images of PdNi/MnO<sub>2</sub>. Red dotted circle highlights the presence of single Pd atom.

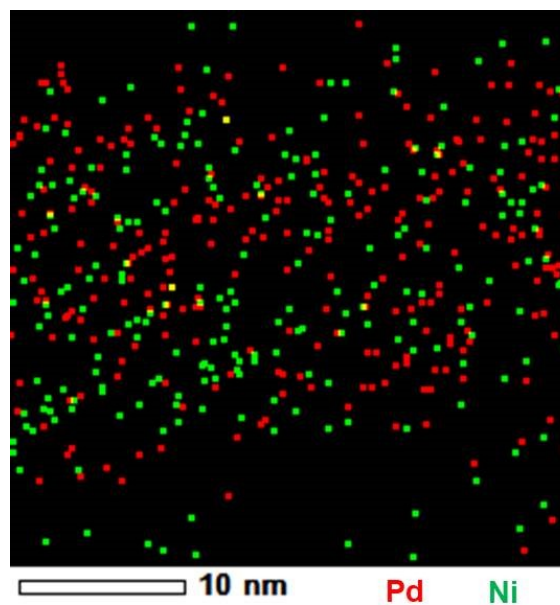

**Figure S7.** EDS mapping image of integrated Pd and Ni elements

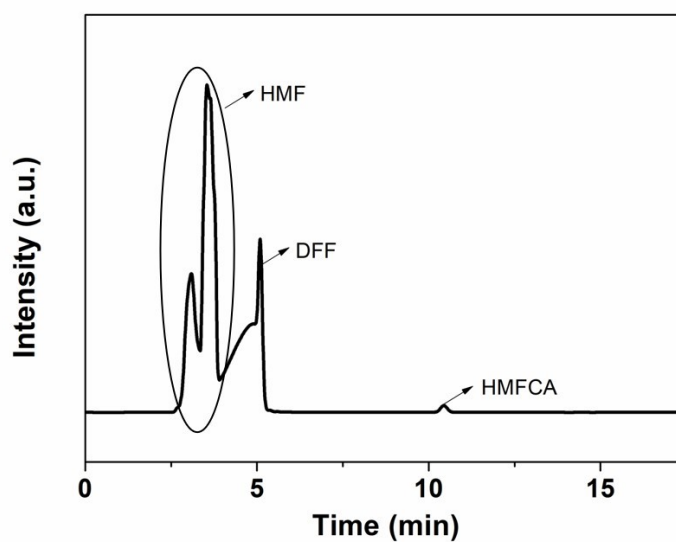

**Figure S8.** HPLC spectra of the product distribution on MnO<sub>2</sub>.



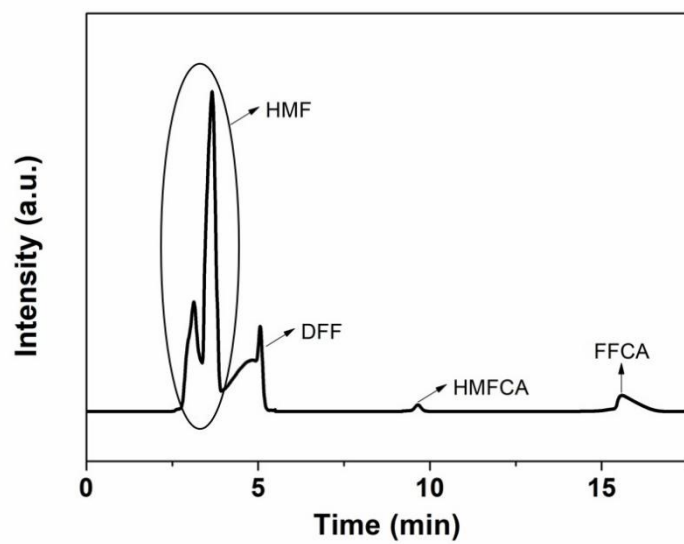

**Figure S9.** HPLC spectra of the product distribution on Pd/MnO<sub>2</sub>.

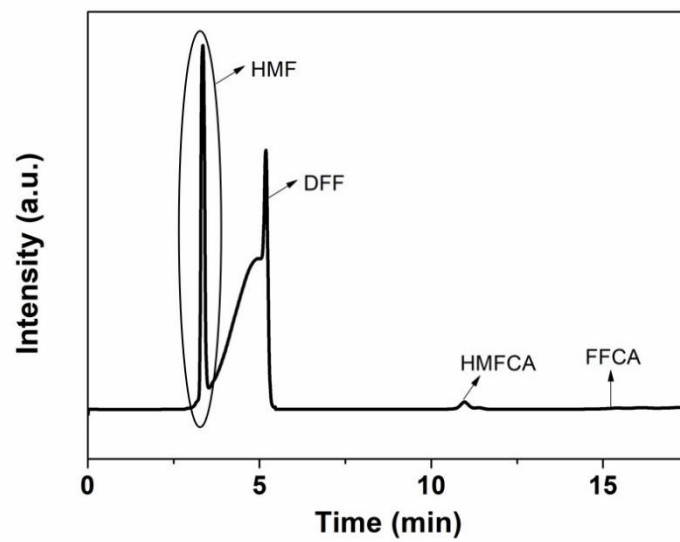

**Figure S10.** HPLC spectra of the product distribution on Ni/MnO<sub>2</sub>.

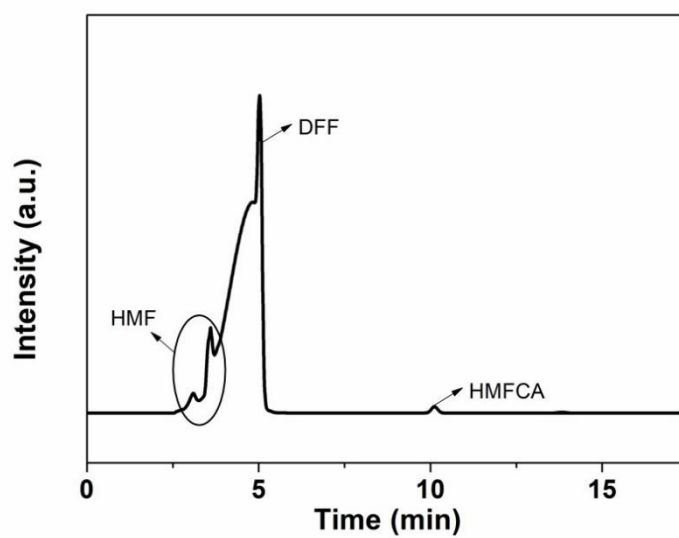

**Figure S11.** HPLC spectra of the product distribution on PdNi/MnO<sub>2</sub>.

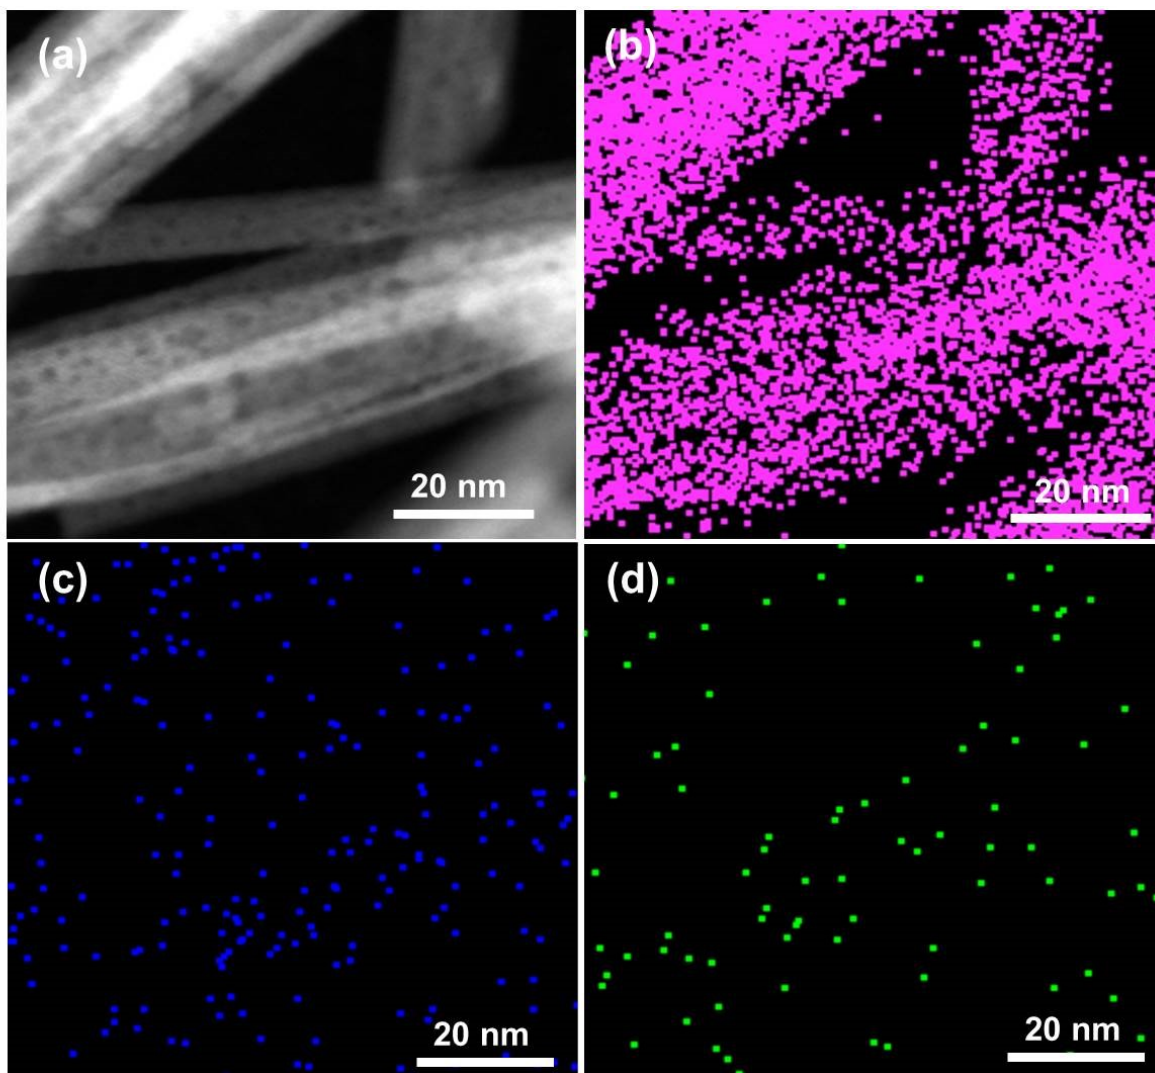

**Figure S12.** HADDF-STEM images of PdNi/MnO<sub>2</sub> after catalytic recycle measurement. (a) dark field image; (b) Mn signal; (c) Pd signal; (d) Ni signal.



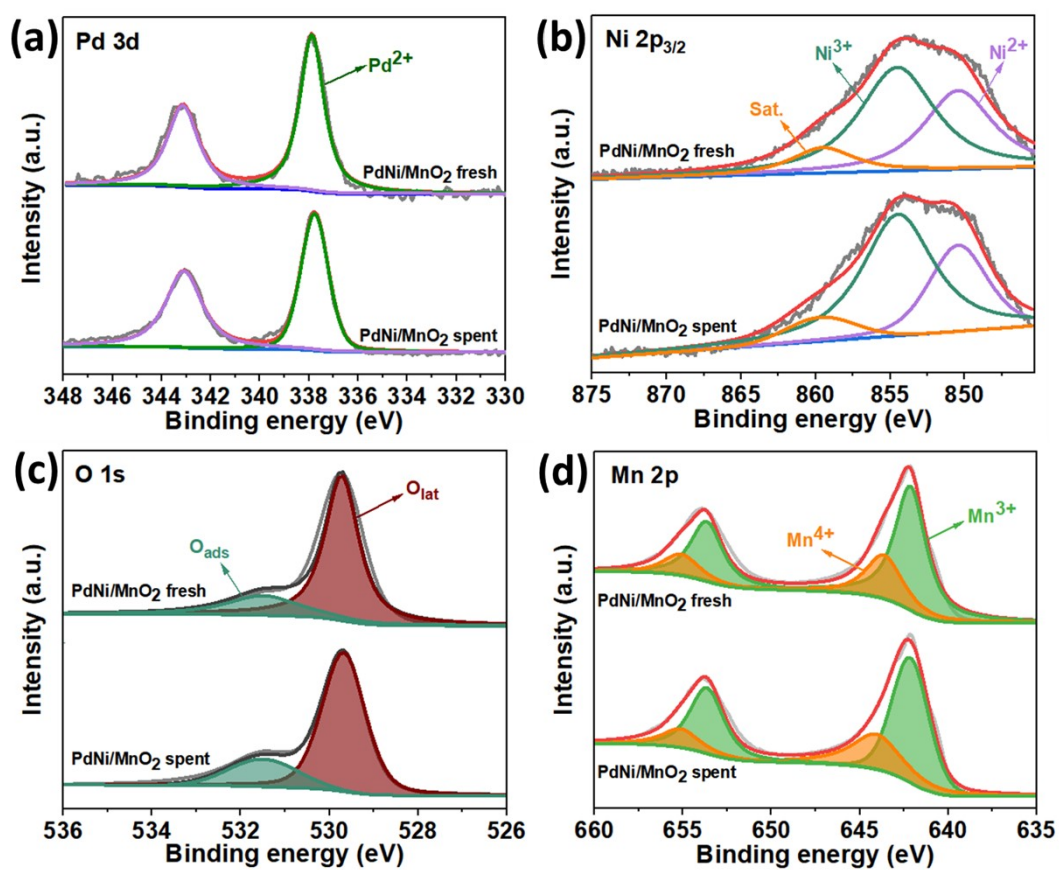

Figure S13. XPS results of the spent and fresh PdNi/MnO<sub>2</sub> catalysts.

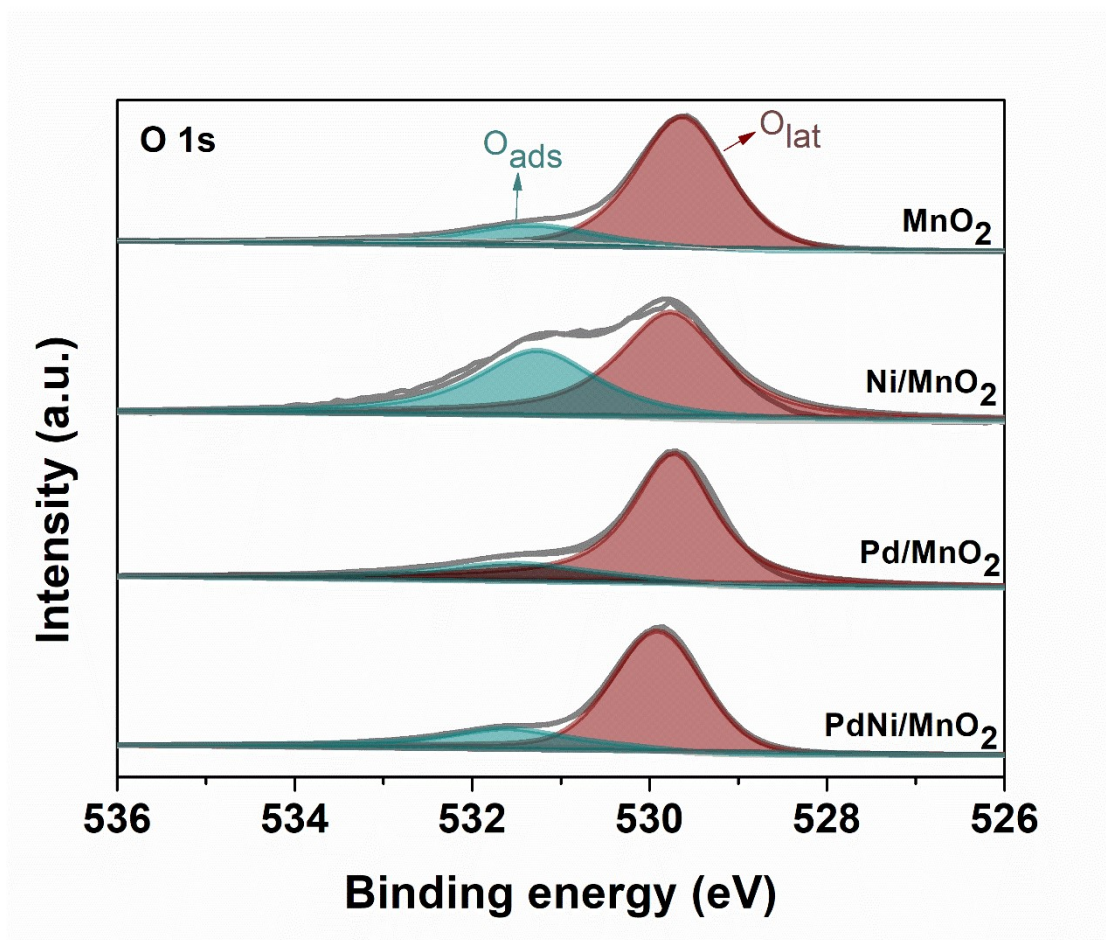

Figure S14. The high-resolution XPS spectrum of O 1s for the prepared catalysts.

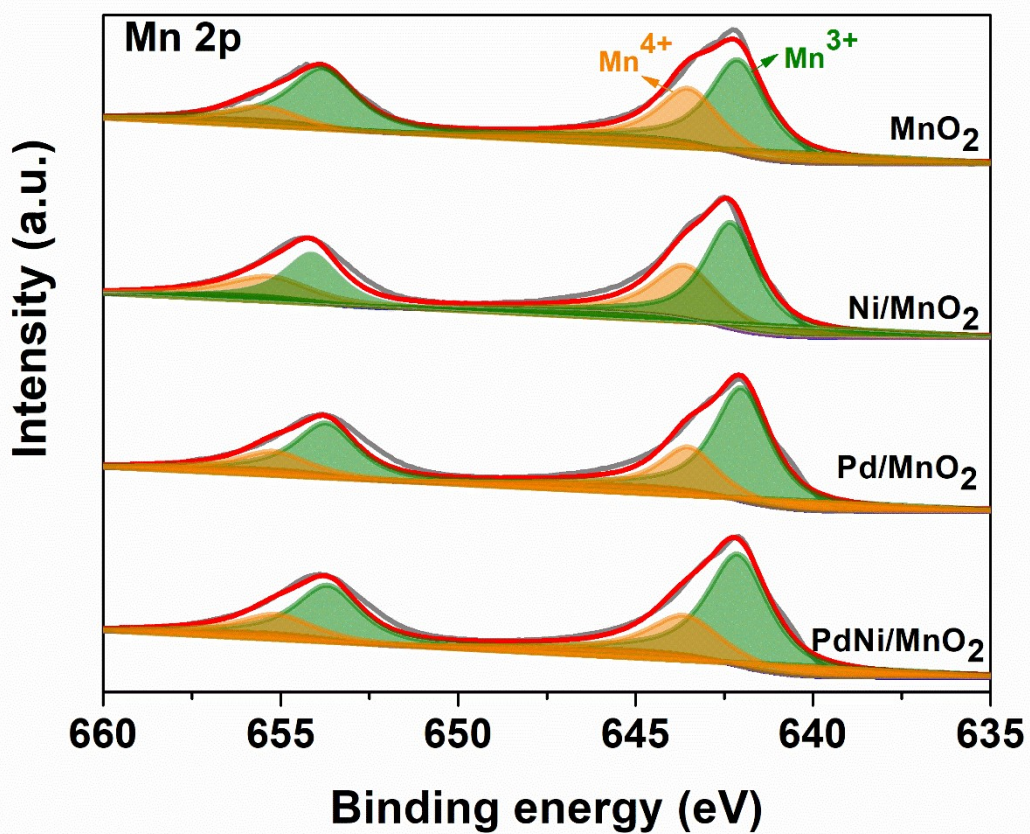

Figure S15. The high-resolution XPS spectrum of Mn 2p for the prepared catalysts.



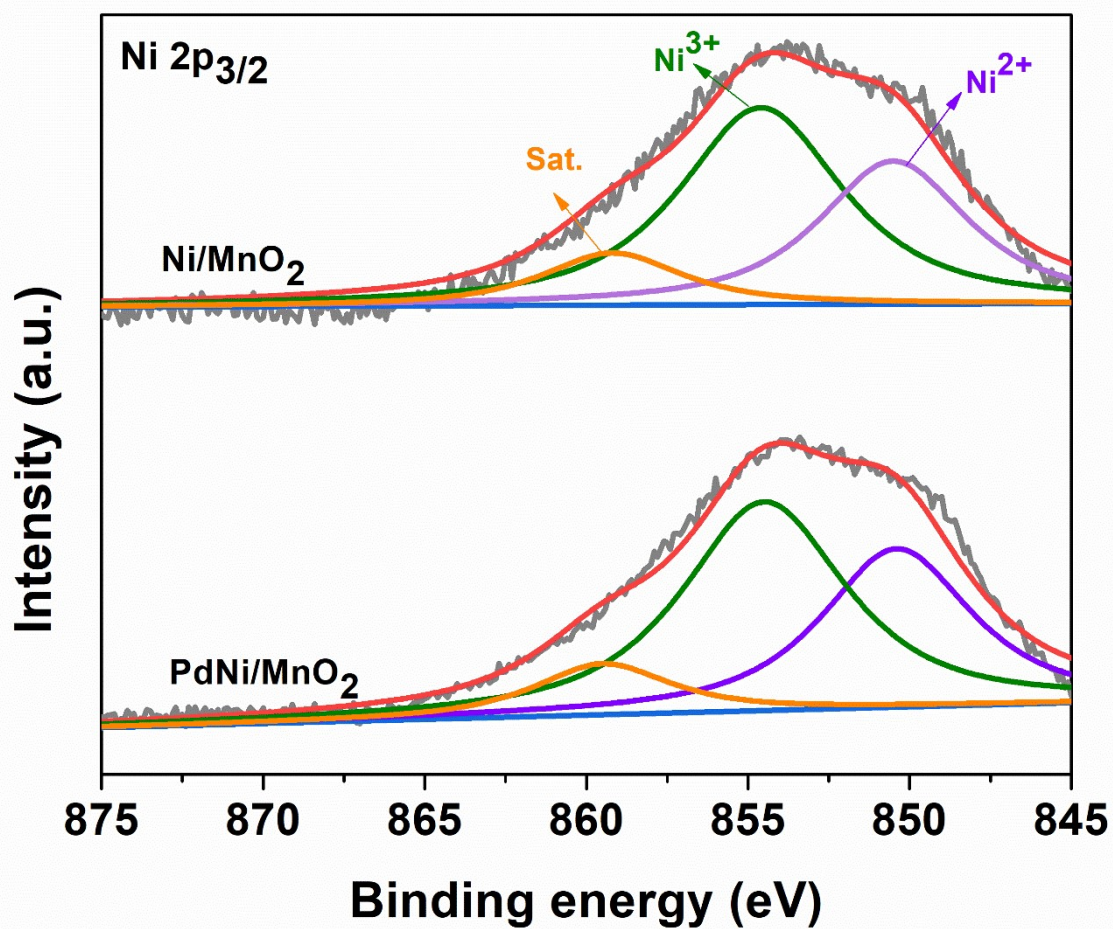

Figure S16. The high-resolution XPS spectrum of Ni 2p<sub>3/2</sub> for the prepared catalysts.

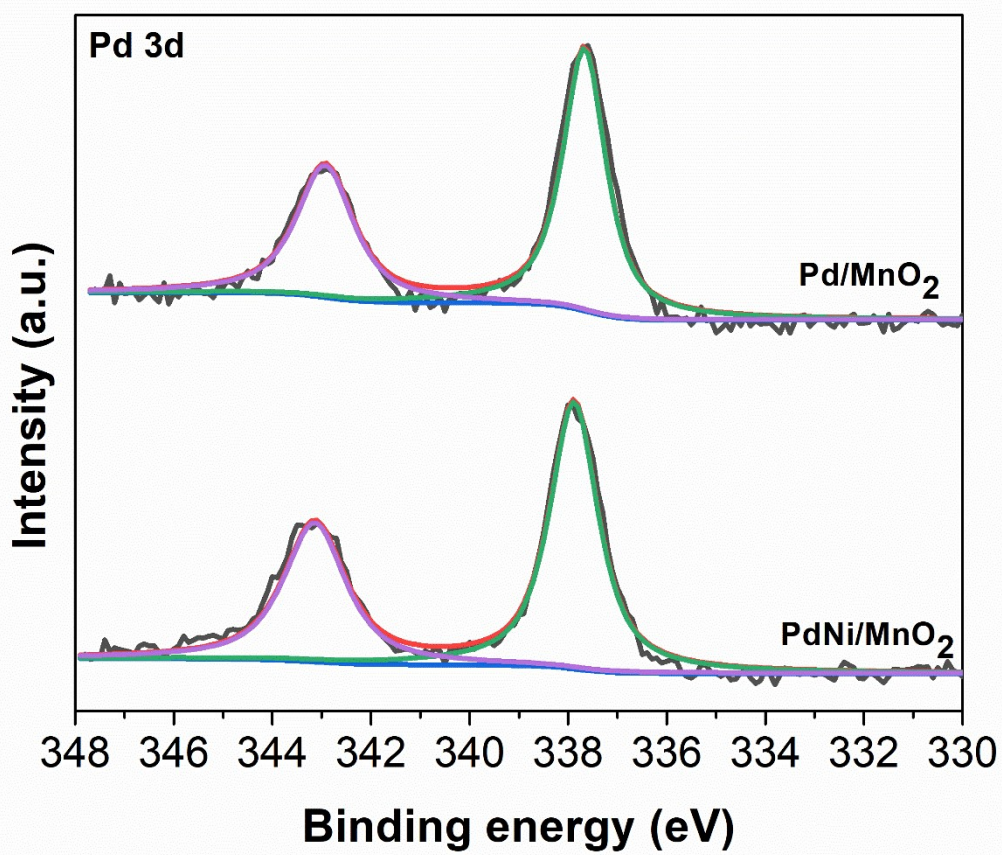

**Figure S17.** The high-resolution XPS spectra of Pd 3d for the prepared catalysts.

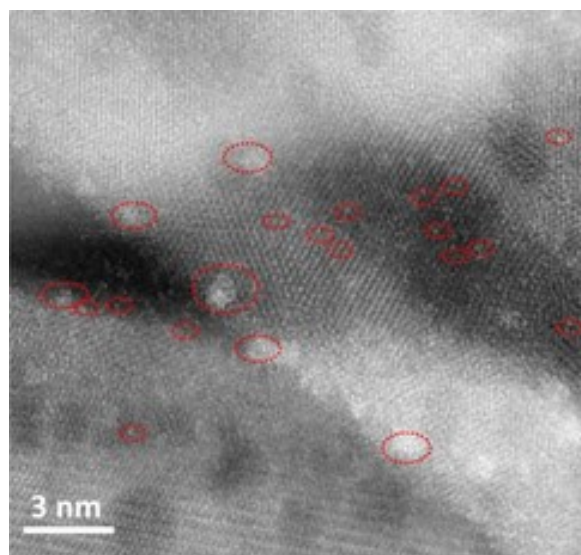

**Figure S18.** HAADF-STEM images of Pd<sub>H</sub>/MnO<sub>2</sub>. The white dots highlighted with red circles are Pd sub-nanoclusters. The figures are adopted from our previous publication *J. Energy Chem.* 2021, 62, 136-144.

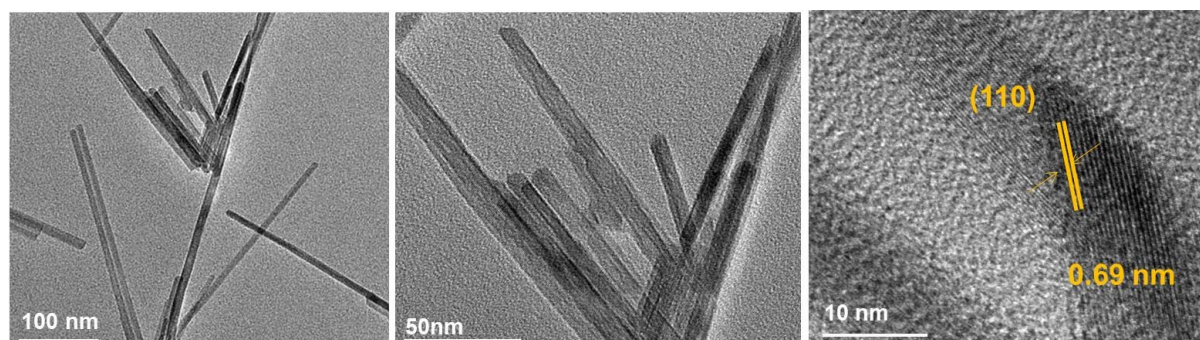

**Figure S19.** HRTEM images of NiPd<sub>H</sub>/MnO<sub>2</sub> prepared by hydrothermal method.



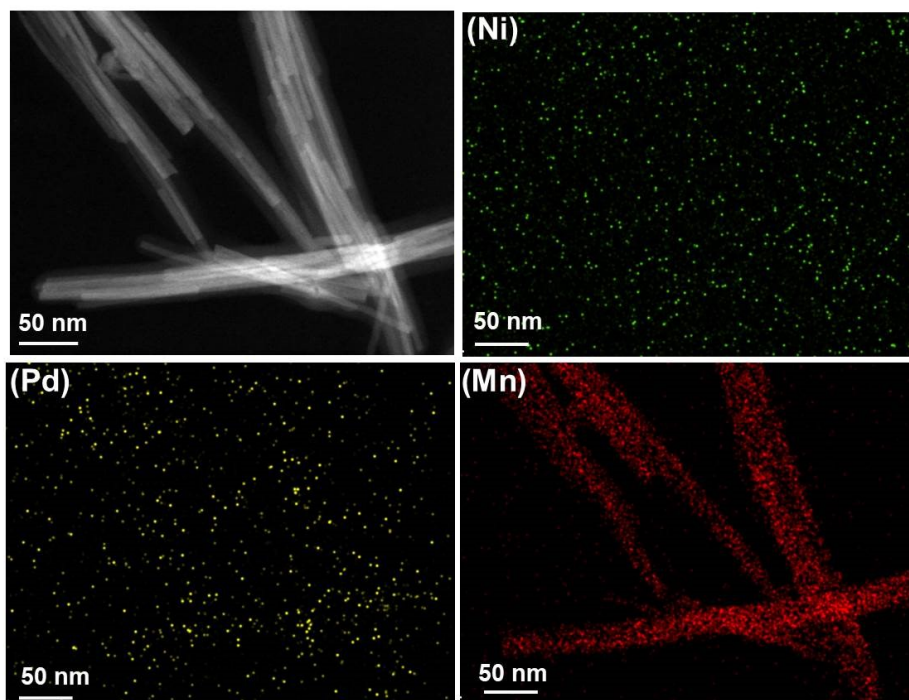

**Figure S20.** STEM image and corresponding EDS element mapping images of Ni, Pd and Mn elements for PdNi<sub>H</sub>/MnO<sub>2</sub>.

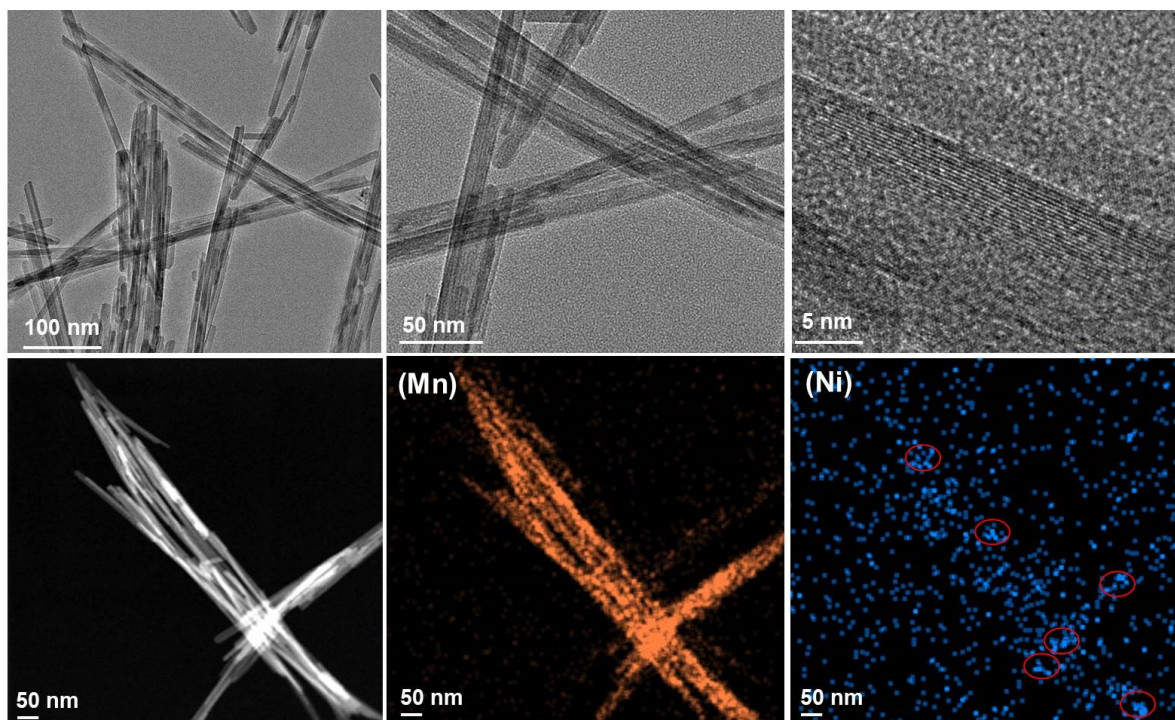

**Figure S21.** STEM image and corresponding EDS element mapping images of Ni and Mn elements for Ni<sub>H</sub>/MnO<sub>2</sub>.

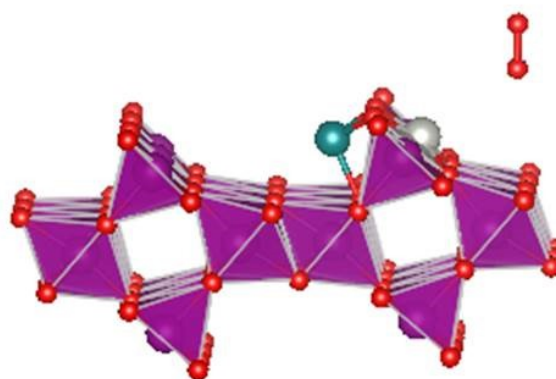

$$\Delta E_{ads}^{O_2}(\text{Pd}) = -0.25 \text{ eV}$$

**Figure S22.** The stable adsorption models of O<sub>2</sub> molecules on Pd site of PdNi/MnO<sub>2</sub>-C.

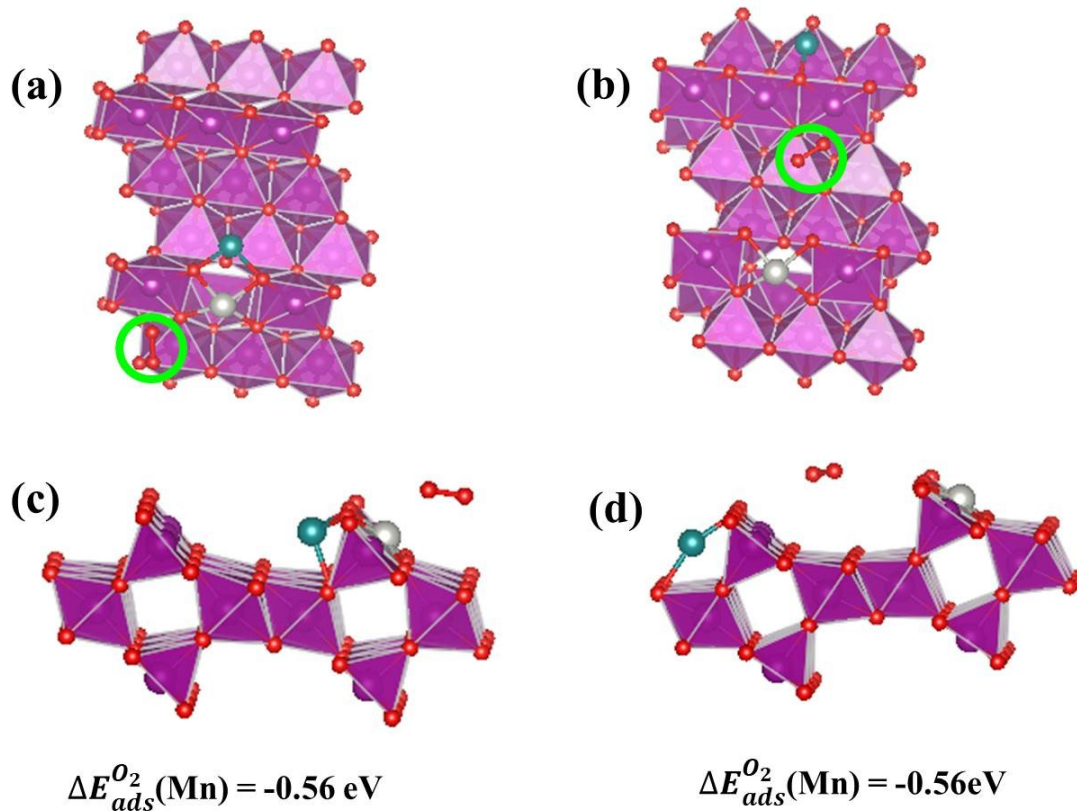

**Figure S23.** The stable adsorption models of  $\text{O}_2$  molecules on Mn site of PdNi/MnO<sub>2</sub>-C by (a-b) top-view and (c-d) side-view. The green circled is oxygen molecule.

**Table S1.** Comparison reaction rates on different Mn, Pd, and Ru based catalysts, as well as single atom catalyst for HMF oxidation to DFF.

| Entry | Catalyst                                 | Conv. HMF (%) | Yield. DFF (%) | T <sub>Reaction</sub> (°C) | Time (h) | Oxidant (MPa)         | Productivity (mmol <sub>DFF</sub> •g <sub>cat</sub> <sup>-1</sup> •h <sup>-1</sup> ) | Refs.     |
|-------|------------------------------------------|---------------|----------------|----------------------------|----------|-----------------------|--------------------------------------------------------------------------------------|-----------|
| 1     | PdNi-MnO <sub>2</sub>                    | 100           | >99            | 120                        | 1        | O <sub>2</sub> , 1.5  | 6.34                                                                                 | This work |
| 2     | Au-Pd/MnO <sub>2</sub>                   | 76.0          | 74.5           | 90                         | 6        | O <sub>2</sub> , 0.1  | 0.84                                                                                 | [1]       |
| 3     | 1.54%Pd/HCN-900                          | 95.6          | 94.6           | 120                        | 6        | O <sub>2</sub> , 0.1  | 3.15                                                                                 | [2]       |
| 4     | MnOx/P25-600-5h                          | 33.2          | 32.2           | 140                        | 2        | Air, 3.0              | 1.61                                                                                 | [3]       |
| 5     | Ru/MnCo <sub>2</sub> O <sub>4</sub>      | 98.3          | 98.3           | 130                        | 3        | O <sub>2</sub> , 1.0  | 4.37                                                                                 | [4]       |
| 6     | α-MnO <sub>2</sub>                       | 93.2          | 78.6           | 140                        | 4        | O <sub>2</sub> , 0.5  | 3.93                                                                                 | [5]       |
| 7     | Ni <sub>3</sub> Mn-LDH                   | 82.3          | 75.1           | 100                        | 4        | O <sub>2</sub> , 0.1  | 0.94                                                                                 | [6]       |
| 8     | Ru <sub>1</sub> /NiO                     | 91.1          | 74.1           | 110                        | 2        | O <sub>2</sub> , 1.0  | 0.46                                                                                 | [7]       |
| 9     | Ru/OMC-P0.56                             | 100           | 88.0           | 90                         | 4        | O <sub>2</sub> , 2.0  | 5.50                                                                                 | [8]       |
| 10    | CoMn <sub>2</sub> O <sub>4</sub> -2:3    | 41.6          | 41.6           | 100                        | 2        | O <sub>2</sub> , 0.8  | 2.08                                                                                 | [9]       |
| 11    | g-Fe <sub>2</sub> O <sub>3</sub> @HAP-Ru | 100           | 89.1           | 90                         | 4        | O <sub>2</sub> , 0.1  | 1.18                                                                                 | [10]      |
| 12    | Ru/g-Al <sub>2</sub> O <sub>3</sub>      | 99.0          | 96.0           | 120                        | 4        | O <sub>2</sub> , 0.28 | 0.60                                                                                 | [11]      |
| 13    | Ru/C                                     | 100           | 95.8           | 110                        | 4        | O <sub>2</sub> , 2.0  | 5.99                                                                                 | [12]      |
| 14    | Ag-OMS-2                                 | 99.0          | 99.0           | 165                        | 4        | Air, 1.5              | 0.83                                                                                 | [13]      |
| 15    | Cs/MnOx                                  | 98.4          | 94.7           | 100                        | 4        | O <sub>2</sub> , 1.0  | 5.92                                                                                 | [14]      |

**Table S2.** Surface composition of Mn and O species determined from XPS analysis.

| Catalyst                    | Binding energy (eV)  |                  | Mn species (%)   |                  | O Species (%)    |                  |                  |
|-----------------------------|----------------------|------------------|------------------|------------------|------------------|------------------|------------------|
|                             | Ni 2p <sub>3/2</sub> |                  | Pd 3d            | Mn 2p            |                  | O 1s             |                  |
|                             | Ni <sup>2+</sup>     | Ni <sup>3+</sup> | Pd <sup>2+</sup> | Mn <sup>3+</sup> | Mn <sup>4+</sup> | O <sub>ads</sub> | O <sub>lat</sub> |
| PdNi/MnO <sub>2</sub> fresh | 850.4                | 854.5            | 337.9            | 71.0             | 29.0             | 22.3             | 77.7             |
| PdNi/MnO <sub>2</sub> spent | 850.4                | 854.4            | 337.8            | 72.3             | 27.7             | 21.9             | 78.1             |



**Table S3.** Metal doping contents and catalytic data of Ni<sub>H</sub>/MnO<sub>2</sub>, Pd<sub>H</sub>/MnO<sub>2</sub>, and PdNi<sub>H</sub>/MnO<sub>2</sub>.

| Catalyst                            | ICP<br>(Pd%) | ICP<br>(Ni%) | XPS<br>(Pd%) | XPS<br>(Ni%) | Conv.<br>(%) | Yield (%) |        |        | Productivity<br>(mmol <sub>DFP</sub> ·g <sub>cat</sub> <sup>-1</sup> ·h <sup>-1</sup> ) |
|-------------------------------------|--------------|--------------|--------------|--------------|--------------|-----------|--------|--------|-----------------------------------------------------------------------------------------|
|                                     |              |              |              |              |              | DFP       | HMFCAs | Others |                                                                                         |
| PdNi <sub>H</sub> /MnO <sub>2</sub> | 0.45         | 0.13         | -            | -            | 100          | 71        | 4      | 24     | 4.50                                                                                    |
| Pd <sub>H</sub> /MnO <sub>2</sub>   | 1.70         | -            | -            | -            | 51           | 32        | 6      | 13     | 2.03                                                                                    |
| Ni <sub>H</sub> /MnO <sub>2</sub>   | -            | 2.61         | -            | -            | 82           | 23        | 14     | 45     | 1.46                                                                                    |

Reaction conditions: m<sub>DMF</sub>/m<sub>catalyst</sub> = 0.8; 20 ml of 1, 4-dioxane; 1.5 MPa of O<sub>2</sub>; T = 120 °C; t = 1h

## References

- [1] Y.Q. Zhu, M. Lu, *RSC. Adv.*, **2015**, 5, 85579.
- [2] Y.Y. Zhu, F.S. Wang, M.Y. Fan, Q. Zhu, Z.P. Dong, *J. Colloid. Interf. Sci.*, **2019**, 553, 588.
- [3] L.F. Chen, W.Y. Yang, Z.Y. Gui, S. Saravanamurugan, A. Riisager, W.R. Cao, Z.W. Qi, *Catal. Today*, **2019**, 319, 105.
- [4] D.K. Mishra, J.K. Cho, Y.J. Kim, *J. Ind. Eng. Chem.*, **2018**, 60, 513-519.
- [5] L.H. Yu, H. Chen, Z. Wen, M.M. Jin, Z.W. Ma, X.L. Ma, Y.S. Sang, M.M. Chen, Y.D. Li, *Catal. Today*, **2021**, 367, 9.
- [6] W.Y. Zhou, Z.J. Kong, Z. Wu, S. Yang, Y. Wang, Y.P. Liu, *Catal. Commun.*, **2021**, 151.106279.
- [7] Y.F. Liu, T. Gan, Q. He, H. Zhang, X.H. He, H.B. Ji, *Ind. Eng. Chem. Res.*, 2020, 59, 4333
- [8] M. Hong, S.Y. Wu, J.T. Li, J. Wang, L.F. Wei, K. Li, *Catal. Commun.*, **2020**, 136, 105909.
- [9] L. Ding, W.Y. Yang, L.F. Chen, H.Y. Cheng, Z.W. Qi, *Catal Today*, 347 (2020) 39-47.
- [10] Z.H. Zhang, Z.L. Yuan, D.G. Tang, Y.S. Ren, K.L. Lv, B. Liu, *Chemsuschem*, **2014**, 7, 3496.
- [11] C.A. Antonyraj, J. Jeong, B. Kim, S. Shin, S. Kim, K.Y. Lee, J.K. Cho, *J. Ind. Eng. Chem.*, **2013**, 19, 1056.
- [12] J.F. Nie, J.H. Xie, H.C. Liu, *J. Catal.*, **2013**, 301, 83.
- [13] G.D. Yadav, R.V. Sharma, *Appl. Catal. B-Environ*, **2014**, 147, 293.
- [14] Z.L. Yuan, B. Liu, P. Zhou, Z.H. Zhang, Q. Chi, *Catal. Sci. Technol.*, **2018**, 8, 4430.
